1 **Title: Comparative mode of action of antimicrobial peptide melimine and**  
2 **its derivative Mel4 against *Pseudomonas aeruginosa***

3

4 Muhammad Yasir, Debarun Dutta, Mark DP Willcox

5 School of Optometry and Vision Science, University of New South Wales, Australia

6

7

8

9

10

11

12

13

14

15

16 **Word Count: 5085**

17

18 **Running title: Mode of action of two antimicrobial peptides**

19

20 **#Corresponding author:**

21 \*Muhammad Yasir

22 Ph.D candidate

23 School of Optometry and Vision Science

24 University of New South Wales Australia

25 Tel: +61414941761

26 Email: m.yasir@student.unsw.edu.au

27 Email: yasirjri85@gmail.com

28

29 This work is original, has not been published and is not being considered for publication

30 elsewhere. Part of this manuscript has been presented as a poster presentation in Australian

31 Society for Microbiology annual meetings in 2017. There are no conflicts of interest for any

32 of the authors that could have influenced the results of this work. Prof. Mark Willcox holds

33 the patent for the melimine peptide.

34 **ABSTRACT**

35 Melimine and Mel4 are chimeric cationic peptides with broad spectrum antimicrobial  
36 activity, and recent investigations have shown that they are highly biocompatible with animal  
37 model and human clinical trials. The current study examined the mechanism of action of  
38 these two antimicrobial peptides against *P. aeruginosa* with a series of investigations.  
39 Antimicrobial activities were determined by MIC and MBC. Endotoxin neutralization was  
40 determined using the LAL assay, effect on the cytoplasmic membrane was evaluated using  
41 DiSC(3)-5 and Sytox green stains, and Syto-9 and PI dyes using flow cytometry. Release of  
42 cytoplasmic materials (ATP and DNA/RNA) were determined using ATP luminescence and  
43 increase in OD<sub>260nm</sub>. The ability to lyse bacteria was studied by measuring a decrease in  
44 OD<sub>620nm</sub>. The MIC of the peptides remained low against *P. aeruginosa* strains, which showed  
45 efficient neutralization of LPS, indicating their role in the anti-pseudomonas and LPS binding  
46 activities. Both AMPs rapidly (starting at 30 seconds) depolarized *P. aeruginosa* cytoplasmic  
47 membrane leading to reduction in viability. Melimine was responsible for more ATP release  
48 (75%) compared to Mel4 (36%) ( $P<0.001$ ) following two minutes exposure. For both  
49 peptides, Sytox green entered cells after five minutes of incubation. Flow cytometry  
50 demonstrated that both the AMPs permeabilized the cell membrane at 30 minutes and  
51 followed by increasing permeability. Similar results were found with DNA/RNA release  
52 experiments. Overall, melimine showed higher ability of membrane disruption, cell lysis  
53 compared to Mel4 ( $P<0.001$ ). Knowledge regarding mechanism of action of these two AMPs  
54 would be helpful in making them as anti-pseudomonas drug.

55 **KEYWORDS** *P. aeruginosa*, Antimicrobial peptides, mechanism of action, membrane  
56 disruption

57

58

## 59 INTRODUCTION

60 *Pseudomonas aeruginosa* is a metabolically versatile ubiquitous Gram-negative opportunistic  
61 pathogen that can cause infections in animals and plants (1). *P. aeruginosa* is responsible for  
62 localized to systemic infections in humans, which can be life threatening. Over the years, *P.*  
63 *aeruginosa* has become one of the most frequent causative agents of nosocomial infections,  
64 associated with substantial morbidity and mortality (2). The current standards of care to treat  
65 *P. aeruginosa* infections are not effective (3) as its outer membrane offers low permeability,  
66 which limits the penetration of antibiotics into the bacterial cells thereby increase antibiotic  
67 resistance (4, 5). Given the severity of *P. aeruginosa* infections and the limited antimicrobial  
68 arsenal with which to treat them, finding new alternative antimicrobials with unique  
69 mechanisms of action is urgently required (6).

70 Antimicrobial peptides (AMPs) are part of the innate immune response of living organisms  
71 and have broad spectrum activity ranging from viruses to parasites at low concentrations (7).  
72 AMPs are usually cationic in nature and have a varying number (from five to over a hundred)  
73 of amino acids. AMPs possess multiple modes of action, rapid bacterial killing kinetics and  
74 little toxicity toward human cells (8, 9). Bacteria do not easily gain resistance to AMPs due to  
75 their fast killing mechanism and multiple target sites (10, 11). The mechanism of action of  
76 AMPs starts by interacting with negatively charged lipopolysaccharides (LPS) in the outer  
77 membranes of Gram negative bacteria (12-14) leading to a destabilization and  
78 permeabilization (15). AMPs are then able to interact with the cytoplasmic membrane.  
79 Several models for the interaction of AMPs with bacterial cytoplasmic membranes have been  
80 proposed, such as “barrel stave” “toroidal pore” and “carpet model” (12). In all of these  
81 models AMPs displace lipids, alter membrane structure and these interactions result in  
82 leakage of cellular contents such as K<sup>+</sup>, ATP and DNA/RNA, ultimately resulting in cell

83 death (16, 17). AMPs can also act intracellularly disrupting DNA, RNA and protein synthesis  
84 (18, 19).

85 Melimine (TLISWIKNKRKQRPRVSRRRRRRGGRRRR) is a cationic hybrid peptide of  
86 melittin and protamine (20). It has broad spectrum activity against a wide range of Gram-  
87 negative and Gram-positive bacteria (including MRSA and multi drug resistant *P.*  
88 *aeruginosa*, fungi and protozoan such as *Acanthamoeba*) (20, 21). Importantly, bacteria did  
89 not develop resistance against melimine when exposed at sub-MIC for 30 consecutive days  
90 (20). Moreover, melimine is not cytotoxic at well above active concentrations (20,  
91 21). Melimine has a random coil confirmation in aqueous environments but increases its  $\alpha$ -  
92 helical content (to 35-40%) in bacterial membrane mimetic environments. This change in  
93 conformation upon binding to the membrane is widely accepted as the first step in the  
94 mechanism of action of many AMPs (22). Melimine disrupts the outer membrane and rapidly  
95 destroys the inner membrane potential of *P. aeruginosa* (23). Melimine retains its  
96 antimicrobial activity when bound to polymers and titanium (20, 21, 24). However, in a  
97 human clinical trials, melimine-coated contact lenses caused corneal staining (25).

98 A shorter sequence of melimine called Mel4 (KNKRKRRRRRRRGGRRRR) has been  
99 designed which was shown to not result in corneal staining after being bound to contact  
100 lenses (26). Mel4 is highly active against *P. aeruginosa* in solution or when immobilized on  
101 surfaces (27). It is non-cytotoxic to mammalian cells *in vitro* (20, 21), animal model studies  
102 *in vivo* and in human clinical trials (26, 28). As can be seen from the amino acid sequence of  
103 both peptides, Mel4 has had several amino acids removed, including the single tryptophan in  
104 melimine. Tryptophan is known to be a highly lipophilic amino acid (29), and many cationic  
105 peptides contain tryptophan as an important part of their mode of action (30-32). Similarly,  
106 other non-polar amino acids such as Leu and Ile can encourage peptide binding and  
107 disruption of cell membranes (33). Given that both the peptides have been extensively

108 investigated with human clinical trials, their bactericidal mechanism is relatively unknown. In  
109 addition, amino acid sequence of Mel4 is different to melimine, its mechanism to kill Gram  
110 negative bacteria is completely unknown. Hence, this study examined and compared the  
111 mode of action of melimine and Mel4 against *P. aeruginosa*.

## 112 **MATERIALS AND METHODS**

113 All experiments were run in triplicate and repeated on three separate occasions, except for  
114 flow cytometry data which were obtained after two repeats. For all experiments, negative  
115 controls for the effect of melimine and Mel4 were simply bacterial cells grown in their  
116 absence.

### 117 **Synthesis of peptides**

118 Melimine and Mel4 ( $\geq 90\%$  purity) used in the current study were synthesized by  
119 conventional solid-phase peptide protocols and procured from the Auspep Peptide Company  
120 (Tullamarine, Victoria, Australia).

### 121 **Bacterial strains**

122 Different strains of *P. aeruginosa* such as 6294 and 6206 (microbial keratitis isolates; 6294  
123 an invasive strain containing the *exoS* gene and 6206 a cytotoxic strain containing the *exoU*  
124 gene) (34), Paer1 (isolated from contact lens induced acute red eye, contains the *exoS* gene  
125 but does not manifest the associated invasive phenotype) (34) and ATCC 19660 (isolated  
126 from human septicaemia; a cytotoxic strain containing the *exoU* gene) (35) were used in the  
127 current study. All these strains were obtained from stock cultures preserved at  $-80\text{ }^{\circ}\text{C}$  in Brain  
128 Heart Infusion (Oxoid, Basingstoke, UK) containing 25% glycerol.

### 129 **Bacterial cell preparation**

130 Bacteria were grown in Tryptic Soy Broth (TSB; Oxoid) for 12-16 h and cells were then  
131 washed with phosphate buffer saline (PBS, NaCl 8 g/L, KCl 0.2 g/L, Na<sub>2</sub>HPO<sub>4</sub> 1.4 g/L,  
132 KH<sub>2</sub>PO<sub>4</sub> 0.24 g/L) and diluted into the same buffer containing 1/1000 TSB to OD<sub>600nm</sub> 0.05-  
133 0.06 ( $1 \times 10^7$  colony forming units (CFU)/ml confirmed upon retrospective plate counts on TS  
134 agar (Oxoid). This inoculum preparation was used in most experiments except for assessing  
135 the minimum inhibitory and bactericidal concentrations and measuring the release of DiSC3-  
136 5 from cells (which was performed in cells ( $1 \times 10^7$  CFU/ml) suspended in HEPES buffer).

### 137 **Minimum inhibitory and bactericidal concentrations**

138 The minimum inhibitory and minimum bactericidal concentrations of melimine and Mel4  
139 were determined for all strains using a modified version of the Clinical Laboratory and  
140 Standard Institute (CLSI) broth microdilution method as reported previously (36), using  
141 Muller Hinton Broth (Oxoid) containing 0.01% v/v acetic acid (Sigma Aldrich, St Louis,  
142 MO, USA) and 0.2% w/v bovine serum albumin (Sigma Aldrich; MHB). Bacterial cells,  
143 diluted to  $5 \times 10^5$  CFU ml<sup>-1</sup> in MHB, were incubated with various concentrations of the  
144 peptides. The MIC was set as the lowest concentration of peptides that reduced bacterial  
145 numbers by  $\geq 90\%$  while the MBC was set as the lowest concentration of peptides that  
146 reduced bacterial growth by  $>99.99\%$  after enumeration of viable bacteria by plate count  
147 method compared to bacteria grown with no antimicrobial agent.

### 148 **Interaction with *P. aeruginosa* lipopolysaccharide**

149 A limulus amoebocyte lysate (LAL) assay was performed to determine the interaction of  
150 AMPs with lipopolysaccharides (LPS) of *P. aeruginosa* using a chromogenic assay kit (Cape  
151 Cod, E. Flamouth, MA, USA). Briefly,  $8 \times 10^{-4}$  nmol/ml LPS from *P. aeruginosa* 10 (Sigma  
152 Aldrich, St Louis, MO, USA) was dissolved with melimine and Mel4 at 1x or 2x MIC in  
153 endotoxin free water (Sigma Aldrich, St Louis, MO, USA) and incubated at 37 °C for 30 min.

154 The interaction of LPS with melimine or Mel4 was assessed as the decrease in OD<sub>405nm</sub>,  
155 following addition of the LAL reagent, compared with control (LPS in endotoxin free water)  
156 without peptides.

### 157 **Cytoplasmic membrane disruption**

158 Three assays were performed to determine whether melimine and Mel4 could affect the  
159 cytoplasmic membrane of *P. aeruginosa*. The DiSC3-5 assay was used to determine the  
160 effect of the peptides on membrane potential. Two assays, Sytox Green and Propidium  
161 Iodide, were conducted to determine whether the peptides could damage cytoplasmic  
162 membranes and allow the stains to penetrate and bind to intracellular nucleic acids. Sytox  
163 Green has a molecular mass of 213.954 g/mol and a topological polar surface area of 28.7 Å<sup>2</sup>,  
164 whereas Propidium Iodide has a molecular mass of 668.087 g/mol and a topological polar  
165 surface area of 55.9 Å<sup>2</sup>(37). Differences in the penetration of these two dyes through the  
166 cytoplasmic membranes may be associated with different sizes of pores formed by the AMPs.

167 Cytoplasmic membrane depolarization by the AMPs was performed as described previously  
168 (23) with melimine and Mel4 at 1x and 2x MIC at the final concentrations. The number of  
169 viable cells were confirmed by serially diluting aliquots of bacteria in D/E neutralizing broth  
170 (Remel, Lenexa, KS, USA) and plating these onto Tryptic Soy Agar (Oxoid, Basingstoke,  
171 UK) containing phosphatidylcholine (0.7 g /L) and Tween 80 (5ml/L). The plates were  
172 incubated at 37 °C overnight and the number of live bacteria were enumerated and expressed  
173 as CFU/ml. Two positive controls of dimethyl sulfoxide (DMSO) (Merck, Billerica, MA,  
174 USA) (20% v/v) in HEPES (100 µl) and sodium azide were used to depolarise the  
175 cytoplasmic membranes of bacteria (38).

176 For Sytox green penetration into cells, the protocol was adopted from Li *et al.*,(39) with a few  
177 modifications. Briefly, bacterial cells, aliquots (100 µl) were dispensed into wells of 96-well

178 plates along with 5 $\mu$ M Sytox green (Invitrogen, Eugene, Oregon, USA). Plates were  
179 incubated for 15 minutes in the dark at room temperature and then 100  $\mu$ l of melimine and  
180 Mel4 were added equal to 1x or 2x as final concentrations. The increase in fluorescence was  
181 measured spectrophotometrically (at an excitation wavelength of 480 nm and an emission  
182 wavelength of 522 nm) every 1 minutes up to 30 minutes, and then after 150 minutes. A  
183 positive control of 1% (v/v) Triton X-100 (Sigma Aldrich, St Louis, MO, USA) in PBS with  
184 1/1000 TSB (100  $\mu$ l) was used to disrupt the cytoplasmic membrane of bacteria.

185 Flow cytometry was used to quantify the ability of melimine and Mel4 to permeabilize  
186 bacterial membranes of *P. aeruginosa* 6294 resulting in incorporation of propidium iodide  
187 (PI) (Invitrogen, Eugene, Oregon, USA) into cells with compromised cell membrane.  
188 Bacterial cells were stained simultaneously with SYTO9 and PI at concentrations of 7.5  $\mu$ M  
189 and 30  $\mu$ M respectively and incubated at room temperature for 15 min. Fluorescence  
190 intensities were recorded with LSRFortessa SORP Flow cytometer after addition of 1x and  
191 2x MIC of melimine or Mel4 at different time points. The wavelength of green fluorescence  
192 was (525/550 nm) bandpass filter for SYTO9 and a red fluorescence (610/20 nm) bandpass  
193 filter for PI (40). Data were acquired and analyzed using Flowjo software (USA). Minimum  
194 20000 events were recorded for each sample.

### 195 **Leakage of intracellular contents**

196 The leakage of ATP and DNA/RNA was measured in separate assays. Aliquots of 100  $\mu$ l of  
197 bacteria were incubated with melimine at the final concentrations equal to 1x or 2xMIC and  
198 at 37 $^{\circ}$ C for 10 min. The samples were taken at 2 min intervals and centrifuged at 9000  $\times$  g for  
199 five minutes and the supernatant was kept on ice until further use. For determination of  
200 internal ATP the bacterial pellets were resuspended in boiling 100 mM Tris, 4 mM EDTA pH  
201 (7.4) and further incubated for 2 mins at 100  $^{\circ}$ C to lyse all the cells. The lysed cells were  
202 centrifuged at 9600  $\times$  g for two minutes and the supernatant was kept on ice until further



203 analysis (41). Subsequently, both total and extracellular ATP were determined using an ATP  
204 bioluminescence kit (Invitrogen, Eugene, Oregon, USA) according to manufacturer's  
205 instructions.

206 The assay for measuring the loss of DNA/RNA was performed according to protocol Carson  
207 *et al.*, (42) with some modification. Aliquotes (100  $\mu$ l) of bacteria was incubated with  
208 melimine and Mel4 at their 1x or 2x MIC and incubated at 37 °C. Samples were collected at  
209 different time intervals, diluted (1:10) and filtered through 0.22  $\mu$ m pores (Merck,  
210 Tullagreen, Ireland). The OD<sub>260nm</sub> of the filtrates was measured in UV-star plate (Greiner  
211 Bio-one GmbH, Frickenhausen, Germany). The results were expressed as the ratio to the  
212 initial OD<sub>260nm</sub>.

### 213 **Lysis of bacteria**

214 This experiment was adopted from the method of Carson *et al.*, (42). The bacterial lytic  
215 potential of the two peptides was evaluated using two different bacterial inoculums  $1 \times 10^8$   
216 CFU/ml and  $3 \times 10^{10}$  CFU/ml. The smaller inoculum size was tested to see whether OD<sub>620nm</sub>  
217 was measurable for  $1 \times 10^8$  CFU/ml. The OD<sub>660nm</sub> of bacterial suspension was adjusted to 0.1  
218 to yield  $1 \times 10^8$  CFU/ml. The larger inoculum size of  $3 \times 10^{10}$  CFU/ml was obtained by  
219 adjusting OD<sub>620nm</sub> 0.3. The bacterial numbers CFU/ml were confirmed by retrospective plate  
220 count. Melimine and Mel4 were added at 1x MIC and 2x MIC as final concentrations.  
221 Bacterial cultures were immediately mixed and then diluted 1:1000 in TSB. The OD<sub>620nm</sub> was  
222 measured and additional readings were taken at 30, 60, 90, 120 minutes, 6.5 and 24 h after  
223 incubating at room temperature. PBS with peptides at their respective concentrations was  
224 used as blank. The results were recorded as a ratio of OD<sub>620nm</sub> at each time point compared to  
225 the OD<sub>620nm</sub> at 0 minutes (in percentage).

### 226 **Statistical analyses**

227 Statistical analyses were performed using GraphPad Prism 7.02 software (GraphPad  
228 Software, La Jolla, CA, USA). The effect of the different concentrations of peptides was  
229 analysed using Tukey's test of multiple comparisons. Correlations between release of  
230 extracellular ATP and bacterial death were examined using Pearson correlation test.  
231 Statistical significance was set as  $P < 0.05$ .

232

## 233 RESULTS

### 234 Inhibitory concentrations of peptides

235 MICs and MBCs for melimine and Mel4 against *P. aeruginosa* are shown in **Table 1**. Mel4  
236 had highest bactericidal activity against *P. aeruginosa* strains 6294, 6206 and ATCC 19660  
237 with a MIC of 26.6 nmol/ml. The MIC was lower for melimine against strains 6294, 6206  
238 and Paer1 at 66 nmol/ml compared to strain ATCC19660. For Mel4, the MIC was lowest  
239 against stains 6206, 6294 and ATCC19660 at 26.6 nmol/ml. For all strains the MBC was  
240 usually 2x the MIC except for strain 6294 where the MBC for both melimine and Mel4 was  
241  $\geq 4X$  the MIC while for ATCC 19660 the MBC for Mel4 was equivalent to the MIC.  
242 Melimine at its lowest MBC needed  $1.59 \times 10^{12}$  molecules per cell to cause death whereas  
243 Mel4 needed  $3.2 \times 10^{11}$  molecules per cell to cause cell death at its lowest MBC.

### 244 Interaction with Lipopolysaccharides

245 Both melimine and Mel4 interacted with the LPS of *P. aeruginosa* and neutralized its  
246 endotoxin activity in a concentration dependent manner. At the 66 nmol/ml concentration  
247 melimine significantly neutralized LPS which was evidenced by reduction of OD<sub>405nm</sub> by  
248  $1/6^{\text{th}}$  compared to the controls. Similarly, melimine at the concentration of 132 nmol/ml  
249 neutralized LPS by  $1/8^{\text{th}}$  compared to the controls. Neutralization of LPS was similar with the  
250 Mel4 which reduced OD<sub>405nm</sub> by half ( $1/2$ ) at 26.6 nmol/ml and  $1/4^{\text{th}}$  at 53.2 nmol/ml  
251 compare to control.

### 252 Membrane disruption

253 Both melimine and Mel4 depolarized the cytoplasmic membrane of *P. aeruginosa* in a  
254 concentration dependent manner. An increase in fluorescence intensity was detected as early  
255 as 30 seconds after addition of either peptide to all the strains of *P. aeruginosa*. **Fig. 1a** shows

256 the data for *P. aeruginosa* 6294, whereas data for all other strains are available in the  
257 supplementary documents. Following 150 seconds of exposure, no further increase in the  
258 release of DiSC3-(5) was seen for any of the strains investigated. Fluorescein intensity was  
259 higher at the MIC of melimine (66 nmol/ml) compared to the MIC of Mel4 (26.6 nmol/ml),  
260 and the same trend was observed throughout the time course ( $P<0.005$ ). This depolarization  
261 of the cytoplasmic membrane was associated with 3.6 log<sub>10</sub> and 4.0 log<sub>10</sub> viable *P. aeruginosa*  
262 6294 inhibition by melimine MIC (66 nmol/ml) and MBC (132 nmol/ml) respectively.  
263 Similarly, there was 2.7 log<sub>10</sub> and 3.2 log<sub>10</sub> reduction by Mel4 MIC (26.6 nmol/ml) and MBC  
264 (53.2 nmol/ml) (**Fig.1b**). Sodium azide also depolarized the cell membrane and released  
265 DiSC3-(5) over the period of testing, but with reduced fluorescence intensity and without  
266 bacterial killing. Sytox green fluorescence increased over time and was detected as early as 5  
267 minutes (**Fig. 2**). The intensity of fluorescence gradually increased over 30 minutes for all the  
268 peptide concentrations for all strains. However, this effect was not concentration dependent.  
269 For both melimine and Mel4 no significant differences were observed between the MIC and  
270 MBC. At their respective MICs, melimine allowed more Sytox green to enter cells than Mel4  
271 after 150 mins ( $P<0.001$ ). Treatment with the positive control Triton-X 100 (1%) resulted  
272 emission of higher Sytox green fluorescence.

273 The membrane damaging effect of these peptides was also assessed with *P. aeruginosa* 6294  
274 by the flow cytometry in the presence of the DNA intercalating dye PI. The peptides were  
275 able to permeabilize the cell membrane in a concentration dependent manner, and this effect  
276 was time-dependent with a higher influx of PI after 150 mins incubation (**Fig.3**). Melimine  
277 permeabilized 52.5% of *P. aeruginosa* 6294 cells at its MIC at 30 min. after 150 minutes of  
278 exposure, PI stained up to 90% of the cells. Although Mel4 permeabilized *P. aeruginosa*  
279 membranes, permeabilization at its MIC was less compared with melimine; Mel4 damaged  
280 only 17.7% cells after 30 min which increased to 46.7% after 150 min (**Fig.3**). The positive

281 control Triton-X 100 (1%) permeabilized the membrane in 18.7% cells initially which  
282 increased up to 34.1% after 130 min. There was also different kinetics of cell death as it can  
283 interact with both lipids as well as proteins, create pores and/or remove both lipids/proteins  
284 from the membrane. with Triton-X 100. The negative control (buffer-treated) behaved as  
285 expected and showed only < 1% PI-stained cells (**Fig.3**).

### 286 **The release of cytoplasmic contents**

287 Melimine caused 75% and 92 % of ATP release at 1x and 2x MIC concentrations after 2  
288 minutes ( $P<0.001$ ) (Figure 4). The increase of extracellular ATP directly correlated with the  
289 loss of viability of *P. aeruginosa* ( $R^2>0.987$ ). Within the first two minutes, melimine  
290 decreased viability by  $> 3.0 \log_{10}$ . Whereas Mel4 released 36% and 44% extracellular ATP at  
291 1x or 2x MIC respectively at 2 minutes (**Fig. 4**). Further incubation for 10 minutes resulted in  
292 a slight increase in the release of extracellular ATP. The release of ATP was associated with  
293 the reduction of  $>2.0 \log_{10}$  viable bacteria. Melimine induced more leakage of ATP than Mel4  
294 ( $P<0.001$ ).

295 **Fig.5** shows the releases of DNA or RNA (260nm absorbing material) following incubation  
296 with the peptides. The release of DNA or RNA of *P. aeruginosa* was first detected at 2  
297 minutes time. Melimine was associated with a dose-dependent release of DNA/RNA which  
298 was significantly higher than observed with the control after 5 min ( $P<0.001$ ). On the other  
299 hand, the release of DNA/RNA was not affected by the concentration of Mel4. Compared  
300 with Mel4, melimine released higher amounts of DNA/RNA at all the time points observed  
301 ( $P<0.001$ ).

### 302 **Bacterial lysis**

303 When the lower cell concentration ( $1 \times 10^8$  CFU/ml) was used, no decrease in  $OD_{620nm}$  could  
304 be seen as the optical density was very low to start with. When higher bacterial inoculum  $1 \times$   
305  $10^{10}$  CFU/ml was used and treated with varying concentrations of peptides over 2 hours, a  
306 significant reduction in  $OD_{620nm}$  was observed (**Fig. 6**). After incubation with melimine, the  
307  $OD_{620nm}$  reduced by  $25 \pm 12\%$  at 1x and  $31 \pm 3\%$  at 2x MIC compared to buffer treated  
308 negative control ( $P < 0.001$ ).  $OD_{620nm}$  was further reduced by  $37 \pm 03\%$  and  $52 \pm 10\%$  with  
309 1x and 2x MIC after 6 hours respectively. This trend continued over the 24 hours assay where  
310 melimine had a higher bacterial-lytic effect and decreased the  $OD_{620nm}$  to more than  $55 \pm 5\%$  at  
311 both the concentrations. A similar trend was seen for Mel4 which reduced the  $OD_{620nm}$  by  
312  $13 \pm 8\%$  and  $21 \pm 6\%$  at 1x and 2x MIC respectively after 2 hours (**Fig. 6**). Further reductions  
313 in  $OD_{620nm}$  by  $20 \pm 3\%$  with 1x and  $48 \pm 5\%$  with 2x MIC was observed for Mel4 after 6.5 h  
314 respectively. Similarly,  $OD_{620nm}$  decreased by  $52 \pm 2\%$  by both the concentrations of Mel4  
315 after 24 h of incubation (Fig. 6). The bacteriolytic efficiency of both melimine and Mel4 was  
316 similar at their MICs ( $P = 0.927$ ) but at 2x MIC melimine reduced higher  $OD_{620nm}$  than 1x  
317 MIC of Mel4 ( $P < 0.004$ ) after 24 hours of incubation. The  $OD_{620nm}$  of control cells without  
318 any peptides remained unchanged over the 24 hours of the experiment.

319

320

321

## 322 DISCUSSION

323 Over last decade, melimine and Mel4 have been extensively studied *in vitro*, with animal  
324 models and human clinical trials. This study for the first time compared and contrasted the  
325 timeline of the antimicrobial mechanism of actions of these two thoroughly investigated  
326 cationic peptides. The following **Fig. 8** summarizes the sequences of membrane interactions  
327 and bactericidal events of the two peptides against *P. aeruginosa* 6294 over the first 2 hours  
328 (120 minutes) of exposure. The effects of each of the peptides on all the strains of *P.*  
329 *aeruginosa* were similar. Both peptides were able to significantly neutralise the endotoxic  
330 activity of LPS. Both peptides could depolarize the cytoplasmic membrane, and this was  
331 associated with rapid loss of cell viability. It was found that loss of viability was quicker with  
332 melimine than Mel4. Cytoplasmic membrane depolarisation was followed by ATP and  
333 DNA/RNA release from cells, which in turn was followed by permeabilization of the  
334 membrane to Sytox green dye that binds to intracellular DNA. When incubated with peptides  
335 for 24 hours 50-60% of cells were lysed.

336 We have found that melimine has higher bactericidal efficacy when compared to Mel4 at the  
337 studied timepoints, and this may be due to their difference in size and structure. The amino  
338 acid length required for the peptides to span bacterial cytoplasmic membranes is  
339 approximately 15–20 residues, which may vary depending on the thickness of the lipid  
340 bilayer (43-45). Mel4 has 17 amino acid, just within the membrane spanning length,  
341 whereas melimine has 29 amino acid which probably allows it to easily span the  
342 cytoplasmic membrane of *P. aeruginosa*. The shorter length of the Mel4 peptide may  
343 mean that it takes longer to penetrate through the outer membrane or start to interact with  
344 the inner membrane of *P. aeruginosa* in order to kill the bacteria, or it needs to orientate  
345 itself more effectively into the membrane to begin to exert its affects.

346 Another possible reason behind the differences in the activity of the two peptides is the  
347 presence of tryptophan in the sequence of melimine. Tryptophan (Trp) is known to interface  
348 with lipid bilayers and can enhance peptide-membrane interactions and facilitate insertion  
349 into the membrane (46, 47). A helical peptide RW-BP100 possess a Trp residue which  
350 confers higher affinity and deeper insertion into bacterial membranes (48). In addition, Trp  
351 has been shown to facilitate the insertion of arginine into the hydrophobic region of  
352 membranes *via* cation- $\pi$  interactions causing rapid membrane disruption (30). Melimine,  
353 partly due to the presence of Trp, adopts a partial  $\alpha$  helix in bio-membrane mimetic  
354 environment (23). A higher helical conformation of peptides is better suited for their  
355 antimicrobial activity (49). As Mel4 lacks tryptophan in its sequence, it may have less  
356 affinity towards phospholipid bilayers (50). Furthermore, the amino acid sequence of Mel4  
357 predicts that it would have a very low hydrophobic moment (0.039; Table 2) meaning that it  
358 is less likely to be attracted within lipid bilayers (51, 52). Also, helical wheel projections of  
359 melimine and Mel4 show that the hydrophobic amino acids in melimine segregate to one  
360 side of the molecule, whereas as there are no hydrophobic amino acids in Mel4 that can  
361 segregate (Figure 7). The lack of the non-polar amino acids Ile and Leu which can  
362 encourage peptide binding and disruption of cell membranes (33) may also affect the initial  
363 mode of action of Mel4. A recent study (53) has demonstrated that Mel4 does not interact  
364 with lipid spheroids composed of 1-oleoyl-2-hydroxy-sn-glycero-3-phosphocholine (PC  
365 18:1) or tethered lipid bilayers composed of 70% zwitterionic C20 diphytanyl-glycero-  
366 phosphatidylcholine lipid and 30% C20 diphytanyl-diglyceride ether whilst melimine can  
367 interact with these lipid layers. The evidence from the current study suggests that it takes  
368 more time for Mel4 to interact with the bacterial membranes to the same extent as melimine  
369 due to the changes in its amino acid sequence and subsequent changes in its structure. Indeed,  
370 for lipid depolarisation at their respective MICs, it took Mel4 approximately 30 seconds



371 longer to achieve the same degree of depolarisation and 60 seconds longer to achieve the  
372 same degree of killing with Mel4 compared to melimine as, evidences by the comparative  
373 timeline (**Fig. 1a & 1b**). To permeabilize the cytoplasmic membrane to allow Sytox green to  
374 enter cells, Mel4 at its MIC took more than 30 minutes to achieve the same degree of  
375 permeabilization that melimine did at its MIC at 5 min. Confirmation of the role of Try, Ile or  
376 Leu in the action of Mel4 need to be confirmed in future studies that incorporate one or more  
377 of these amino acids in Mel4.

378 The membrane depolarization caused by both melimine and Mel4 was a concentration  
379 dependent event. These results are in agreement with previous studies showing a  
380 concentration-dependent depolarizing effect of the helical peptide LL-37 on *P. aeruginosa*,  
381 and PMAP-36, GI24 and melittin on *E. coli* cell membranes (54, 55). To further confirm  
382 whether membrane depolarization was a lethal event for these peptides, viable count was  
383 performed. Both AMPs reduced bacterial numbers upon membrane depolarization. Higher  
384 concentration of AMPs resulted in higher degrees of depolarization which in turn lead to  
385 larger amounts of bacterial death. Interestingly, sodium azide depolarization of the cell  
386 membrane did not affect cell viability. This suggest that membrane depolarization by itself  
387 was not sufficient to cause death of *P. aeruginosa*.

388 The membrane potential is essential for bacterial replication and ATP generation (56).  
389 Dissipation of the membrane potential may increase membrane permeability resulting in loss  
390 of cytoplasmic contents such as ATP (57). In the present study more than 70% ATP was  
391 released by melimine and approximately 35% by Mel4 following 2 minutes exposure, and the  
392 amount of ATP released plateaued at after four minutes exposure to both peptides. The effect  
393 of melimine is similar to the AMP porcine cathelicidin's PR-39 effect of *E. coli* which  
394 induced 80% ATP leakage (58). The leakage of ATP results in depletion of intracellular ATP  
395 which in turn can lead to bacterial death (56). Interestingly, over the course of the study (10

396 mins), the amount of ATP released from cells during exposure to Mel4 never reached the  
397 amount released following exposure to melimine and also appeared to plateau indicating  
398 saturation. ATP released by bacteria can be depleted in supernatants of cells, possibly by  
399 hydrolysis at their cell surfaces (59). The data from the current experiments may indicate that  
400 cells treated with Mel4 retain some capacity to degrade extracellular ATP.

401 The permeability of cytoplasmic membrane also resulted in Sytox green uptake into cells.  
402 However, this uptake was relatively slow, and did not reach the level obtained with the  
403 positive control Triton X-100. Indeed, after 30 minutes incubation the amount of fluorescence  
404 due to Sytox green entering cells was equivalent to the amount that had entered cells after 10  
405 minutes exposure to Triton X-100 when incubated with melimine, and <5 minutes when  
406 incubated with Mel4. Furthermore, with either melimine or Mel4 it took approximately 5  
407 minutes for any fluorescence due to Sytox green to be registered. The difference in the time  
408 between membrane depolarization and Sytox green entering cells may be due to Sytox green  
409 requiring relatively large pore sizes in bacterial cell membranes for its uptake and time to  
410 intercalate with DNA. Compared with Sytox green uptake, ATP release was faster, and this  
411 may be due to the different mechanisms of entry/exit through cellular membrane. For  
412 example, the pore size needed for ATP to penetrate through membranes is a pore size of 1.5  
413 nm (60), which is smaller than that needed for Sytox green to enter into cells. It may also take  
414 a longer time of Sytox green to cross the bacterial membranes and intercalate with DNA (61,  
415 62). Similar kinetics to the current study of Sytox green staining resulting from interactions  
416 of the AMPs melittin and LL-37 has been reported against other Gram negative bacteria such  
417 as *P. aeruginosa*, *E. coli* and *Salmonella typhimurium* (63).

418 To further assess whether the peptides could damage the bacterial cell membrane, PI stain  
419 was used as an indicator of cells with ruptured membranes. Flow cytometry analysis  
420 indicated that treatment of *P. aeruginosa* with the both AMPs enhanced uptake of PI,

421 suggesting that the bacterial cell membrane was disrupted. More than 50 % cells stained with  
422 PI after exposure to melimine for 30 minutes at its MIC. However, Mel4 took longer (150  
423 min) for a similar amount of the cells to stain with PI at its MIC (**Fig. 3**). The positive control  
424 Triton-X resulted in less PI positive cells at this time point suggesting different rates of  
425 membrane permeabilization. Therefore, the sequence of steps occurring at the membrane,  
426 appears to begin with depolarization (with ATP and initial DNA/RNA leakage) and followed  
427 by more significant membrane disruption resulting in Sytox green and PI influx.

428 Melimine caused a concentration-dependent release of DNA/RNA (260nm absorbing  
429 material) as early as in 2 min, which is consistent with the results obtained by Minahk *et al.*,  
430 (64) who demonstrated a concentration-dependent release of DNA/RNA from *Listeria*  
431 *monocytogenes* after treatment with the antimicrobial peptide Enterocin CRL35 at the  
432 concentrations equal to its MIC and >4X its MIC. However, Mel4 induced release of  
433 DNA/RNA was dose independent. There was also a stepped release of DNA/RNA, with an  
434 initial burst release 2 minutes after addition of melimine or Mel4, and then another release of  
435 DNA/RNA between 60-150 minutes after addition of the peptides. The amount of DNA/RNA  
436 release caused by Mel4 did not reach the level released after exposure to melimine even at  
437 longer incubation times. AMPs have been shown to permeabilize bacterial membranes by  
438 forming morphologically diverse pores in terms of diameter, lipid conformation surrounding  
439 the pores, life span and threshold of AMPs require to stabilize the pores (65), and perhaps  
440 melimine and Mel4 form morphologically diverse pores which affect release of large  
441 molecules such as DNA/RNA. The two-step process of DNA/RNA release may be due to  
442 damage and disintegration of DNA/RNA within the cell over the 150 minutes incubation with  
443 the peptides allowing smaller lengths of DNA to exit cells. This may occur during so-called  
444 bacterial apoptosis-like death, mediated via *recA*, such as occurs during antibiotic-induced  
445 bacterial death (66). Examining changes in *recA* and the size of the liberated DNA/RNA in

446 future experiments may help understand this further. In conclusion this study has revealed a  
447 comprehensive timeline of the mode of actions of melimine and Mel4 against *P. aeruginosa*  
448 involved disruption of the cell membranes, efflux of its intracellular contents and lysis of  
449 bacteria. It is likely that the amphipathic characteristics of melimine allowed disruption of the  
450 cell membrane more rapidly than Mel4 which only had very low amphipathicity.

#### 451 **ACKNOWLEDGEMENTS**

452 This work was supported by Australian Research Council (ARC) discovery project funding  
453 scheme (project number DP160101664). Authors are grateful to Christopher Brownlee of the  
454 Biological Resources Imaging Lab (BRIL) at the University of New South Wales, Australia  
455 for helping in Flow Cytometry analysis

456

457

458

459

460

461

462

463

464

465

466

467

468 **REFERENCES**

469

- 470 1. Strateva T, Mitov I. 2011. Contribution of an arsenal of virulence factors to  
471 pathogenesis of *Pseudomonas aeruginosa* infections. *Ann of Microbiol* **61**:717-732.
- 472 2. Buhl M, Peter S, Willmann M. 2015. Prevalence and risk factors associated with  
473 colonization and infection of extensively drug-resistant *Pseudomonas aeruginosa*: a  
474 systematic review. *Expert Rev Anti Infect Ther* **13**:1159-70.
- 475 3. Hancock RE, Speert DP. 2000. Antibiotic resistance in *Pseudomonas aeruginosa*:  
476 mechanisms and impact on treatment. *Drug Resist Updat* **3**:247-255.
- 477 4. Breidenstein EB, de la Fuente-Núñez C, Hancock RE. 2011. *Pseudomonas*  
478 *aeruginosa*: all roads lead to resistance. *Tren in Microbiol* **19**:419-426.
- 479 5. Henrichfreise B, Wiegand I, Pfister W, Wiedemann B. 2007. Resistance mechanisms  
480 of multiresistant *Pseudomonas aeruginosa* strains from Germany and correlation with  
481 hypermutation. *Antimicrob Agents and Chemother* **51**:4062-4070.
- 482 6. Gellatly SL, Hancock REW. 2013. *Pseudomonas aeruginosa* : new insights into  
483 pathogenesis and host defenses. *Path Dis* **67**:159-173.
- 484 7. Bahar AA, Ren D. 2013. Antimicrobial peptides. *Pharmaceuticals* **6**:1543-1575.
- 485 8. Matsuzaki K. 2009. Control of cell selectivity of antimicrobial peptides. *Biochim*  
486 *Biophys Acta* **1788**:1687-1692.
- 487 9. Lee J-K, Park S-C, Hahm K-S, Park Y. 2013. Antimicrobial HPA3NT3 peptide  
488 analogs: placement of aromatic rings and positive charges are key determinants for  
489 cell selectivity and mechanism of action. *Biochim Biophys Acta* **1828**:443-454.
- 490 10. Altman H, Steinberg D, Porat Y, Mor A, Fridman D, Friedman M, Bachrach G. 2006.  
491 In vitro assessment of antimicrobial peptides as potential agents against several oral  
492 bacteria. *J Antimicrob Chemother* **58**:198-201.

- 493 11. Seo MD, Won HS, Kim JH, Mishig-Ochir T, Lee BJ. 2012. Antimicrobial peptides  
494 for therapeutic applications: a review. *Molecules* **17**:12276-86.
- 495 12. Shai Y. 1999. Mechanism of the binding, insertion and destabilization of phospholipid  
496 bilayer membranes by alpha-helical antimicrobial and cell non-selective membrane-  
497 lytic peptides. *Biochim Biophys Acta* **1462**:55-70.
- 498 13. Peschel A, Sahl H-G. 2006. The co-evolution of host cationic antimicrobial peptides  
499 and microbial resistance. *Nat Rev Microbiol* **4**:529.
- 500 14. Schuller F, Benz R, Sahl HG. 1989. The peptide antibiotic subtilin acts by formation  
501 of voltage-dependent multi-state pores in bacterial and artificial membranes. *Eur J*  
502 *Biochem* **182**:181-6.
- 503 15. Tennessen JA. 2005. Molecular evolution of animal antimicrobial peptides:  
504 widespread moderate positive selection. *J Evol Biol* **18**:1387-94.
- 505 16. Abee T. 1995. Pore-forming bacteriocins of Gram-positive bacteria and self-  
506 protection mechanisms of producer organisms. *FEMS Microbiol Lett* **129**:1-9.
- 507 17. Pag U, Oedenkoven M, Sass V, Shai Y, Shamova O, Antcheva N, Tossi A, Sahl H-G.  
508 2008. Analysis of in vitro activities and modes of action of synthetic antimicrobial  
509 peptides derived from an  $\alpha$ -helical 'sequence template'. *J. Antimicrob Chemother.*  
510 **61**:341-352.
- 511 18. Brogden KA. 2005. Antimicrobial peptides: pore formers or metabolic inhibitors in  
512 bacteria? *Nat Rev Microbiol* **3**:238-50.
- 513 19. Straus SK, Hancock RE. 2006. Mode of action of the new antibiotic for Gram-  
514 positive pathogens daptomycin: comparison with cationic antimicrobial peptides and  
515 lipopeptides. *Biochim Biophys Acta* **1758**:1215-23.

- 516 20. Willcox M, Hume E, Aliwarga Y, Kumar N, Cole N. 2008. A novel cationic-peptide  
517 coating for the prevention of microbial colonization on contact lenses. *J Appl*  
518 *Microbiol* **105**:1817-1825.
- 519 21. Dutta D, Cole N, Kumar N, Willcox MDP. 2013. Broad Spectrum Antimicrobial  
520 Activity of Melimine Covalently Bound to Contact Lenses. *Inves Ophthalm Visual*  
521 *Science* **54**:175-182.
- 522 22. Gao G, Cheng JT, Kindrachuk J, Hancock RE, Straus SK, Kizhakkedathu JN. 2012.  
523 Biomembrane interactions reveal the mechanism of action of surface-immobilized  
524 host defense IDR-1010 peptide. *Chem Biol* **19**:199-209.
- 525 23. Rasul R, Cole N, Balasubramanian D, Chen R, Kumar N, Willcox MDP. 2010.  
526 Interaction of the antimicrobial peptide melimine with bacterial membranes. *Int J of*  
527 *Antimicrob Agents* **35**:566-572.
- 528 24. Chen RX, Willcox MDP, Ho KKK, Smyth D, Kumar N. 2016. Antimicrobial peptide  
529 melimine coating for titanium and its in vivo antibacterial activity in rodent  
530 subcutaneous infection models. *Biomaterials* **85**:142-151.
- 531 25. Dutta D, Ozkan J, Willcox MDP. 2014. Biocompatibility of Antimicrobial Melimine  
532 Lenses: Rabbit and Human Studies. *Optom and Vis Sci* **91**:570-581.
- 533 26. Dutta D, Zhao T, Cheah KB, Holmlund L, Willcox MDP. 2017. Activity of a  
534 melimine derived peptide Mel4 against *Stenotrophomonas*, *Delftia*, *Elizabethkingia*,  
535 *Burkholderia* and biocompatibility as a contact lens coating. *Cont Lens Ant Eye*  
536 **40**:175-183.
- 537 27. Dutta D, Kumar N, DP Willcox M. 2016. Antimicrobial activity of four cationic  
538 peptides immobilised to poly-hydroxyethylmethacrylate. *Biofouling* **32**:429-438.

- 539 28. Dutta D, Kamphuis B, Ozcelik B, Thissen H, Pinarbasi R, Kumar N, Willcox MDP.  
540 2018. Development of Silicone Hydrogel Antimicrobial Contact Lenses with Mel4  
541 Peptide Coating. *Optom Vis Sci* **95**:937-946.
- 542 29. Mishra AK, Choi J, Moon E, Baek K-H. 2018. Tryptophan-Rich and Proline-Rich  
543 Antimicrobial Peptides. *Molecules* **23**:815.
- 544 30. Chan DI, Prenner EJ, Vogel HJ. 2006. Tryptophan-and arginine-rich antimicrobial  
545 peptides: structures and mechanisms of action. *Biochimic Biophys Acta* **1758**:1184-  
546 1202.
- 547 31. Bi X, Wang C, Ma L, Sun Y, Shang D. 2013. Investigation of the role of tryptophan  
548 residues in cationic antimicrobial peptides to determine the mechanism of  
549 antimicrobial action. *J Appl Microbiol* **115**:663-672.
- 550 32. Zhu X, Ma Z, Wang J, Chou S, Shan A. 2014. Importance of tryptophan in  
551 transforming an amphipathic peptide into a *Pseudomonas aeruginosa*-targeted  
552 antimicrobial peptide. *PLoS one* **9**:e114605.
- 553 33. Saint Jean KD, Henderson KD, Chrom CL, Abiuso LE, Renn LM, Caputo GA. 2018.  
554 Effects of Hydrophobic Amino Acid Substitutions on Antimicrobial Peptide  
555 Behavior. *Prob Antimicro Proteins* **10**:408-419.
- 556 34. Zhu H, Conibear TC, Bandara R, Aliwarga Y, Stapleton F, Willcox MD. 2006. Type  
557 III secretion system-associated toxins, proteases, serotypes, and antibiotic resistance  
558 of *Pseudomonas aeruginosa* isolates associated with keratitis. *Curr Eye Res* **31**:297-  
559 306.
- 560 35. Pillar CM, Hazlett LD, Hobden JA. 2000. Alkaline protease-deficient mutants of  
561 *Pseudomonas aeruginosa* are virulent in the eye. *Curr Eye Res* **21**:730-9.



- 562 36. Wiegand I, Hilpert K, Hancock REW. 2008. Agar and broth dilution methods to  
563 determine the minimal inhibitory concentration (MIC) of antimicrobial substances.  
564 *Nat Protoc* **3**:163-175.
- 565 37. Anonymous. 2018. <https://pubchem.ncbi.nlm.nih.gov/compound/>. Accessed 10-April  
566 2018.
- 567 38. te Winkel JD, Gray DA, Seistrup KH, Hamoen LW, Strahl H. 2016. Analysis of  
568 antimicrobial-triggered membrane depolarization using voltage sensitive dyes. *Front*  
569 *Cell and Dev Biol* **4**:29.
- 570 39. Li L, Shi Y, Su G, Le G. 2012. Selectivity for and destruction of Salmonella  
571 typhimurium via a membrane damage mechanism of a cell-penetrating peptide  
572 ppTG20 analogue. *Int J of Antimicrob Agents* **40**:337-343.
- 573 40. Orman MA, Brynildsen MP. 2013. Establishment of a method to rapidly assay  
574 bacterial persister metabolism. *Antimicrob Agents and Chemother* **57**:4398-4409.
- 575 41. Veldhuizen EJ, Schneider VA, Agustindari H, Van Dijk A, Tjeerdsma-van  
576 Bokhoven JL, Bikker FJ, Haagsman HP. 2014. Antimicrobial and immunomodulatory  
577 activities of PR-39 derived peptides. *PLoS One* **9**:e95939.
- 578 42. Carson CF, Mee BJ, Riley TV. 2002. Mechanism of action of Melaleuca alternifolia  
579 (tea tree) oil on Staphylococcus aureus determined by time-kill, lysis, leakage, and  
580 salt tolerance assays and electron microscopy. *Antimicrob Agents and Chemother*  
581 **46**:1914-1920.
- 582 43. Beevers AJ, Dixon AM. 2010. Helical membrane peptides to modulate cell function.  
583 *Chem Soci Rev* **39**:2146-2157.
- 584 44. MacKenzie KR. 2006. Folding and stability of  $\alpha$ -helical integral membrane proteins.  
585 *Chem Rev* **106**:1931-1977.

- 586 45. Popot J-L, Engelman DM. 2000. Helical membrane protein folding, stability, and  
587 evolution. *Ann Rev of Biochem* **69**:881-922.
- 588 46. Chan DI, Prenner EJ, Vogel HJ. 2006. Tryptophan- and arginine-rich antimicrobial  
589 peptides: Structures and mechanisms of action. *Biochim Biophys Acta* **1758**:1184-  
590 1202.
- 591 47. Yau W-M, Wimley WC, Gawrisch K, White SH. 1998. The preference of tryptophan  
592 for membrane interfaces. *Biochemistry* **37**:14713-14718.
- 593 48. Torcato IM, Huang Y-H, Franquelim HG, Gaspar D, Craik DJ, Castanho MA,  
594 Henriques ST. 2013. Design and characterization of novel antimicrobial peptides, R-  
595 BP100 and RW-BP100, with activity against Gram-negative and Gram-positive  
596 bacteria. *Biochimic Biophys Acta* **1828**:944-955.
- 597 49. Blondelle SE, Houghten RA. 1991. Hemolytic and antimicrobial activities of the  
598 twenty-four individual omission analogs of melittin. *Biochemistry* **30**:4671-4678.
- 599 50. Kleinschmidt JH. 2003. Membrane protein folding on the example of outer membrane  
600 protein A of Escherichia coli. *Cell and Mol Life Sci* **60**:1547-1558.
- 601 51. Dathe M, Wieprecht T, Nikolenko H, Handel L, Maloy WL, MacDonald DL,  
602 Beyermann M, Bienert M. 1997. Hydrophobicity, hydrophobic moment and angle  
603 subtended by charged residues modulate antibacterial and haemolytic activity of  
604 amphipathic helical peptides. *FEBS Lett* **403**:208-12.
- 605 52. Pérez-Payá E, Houghten RA, Blondelle SE. 1995. The role of amphipathicity in the  
606 folding, self-association and biological activity of multiple subunit small proteins. *J*  
607 *Biol Chem* **270**:1048-1056.
- 608 53. Berry T, Dutta D, Chen R, Leong A, Wang H, Donald WA, Parviz M, Cornell B,  
609 Willcox M, Kumar N, Cranfield CG. 2018. The lipid membrane interactions of the

- 610 cationic antimicrobial peptide chimeras melimine and cys-melimine. *Langmuir*  
611 doi:10.1021/acs.langmuir.8b01701.
- 612 54. Zhu X, Shan A, Ma Z, Xu W, Wang J, Chou S, Cheng B. 2015. Bactericidal  
613 efficiency and modes of action of the novel antimicrobial peptide T9W against  
614 *Pseudomonas aeruginosa*. *Antimicrob Agents and Chemother* **59**:3008-3017.
- 615 55. Lv Y, Wang J, Gao H, Wang Z, Dong N, Ma Q, Shan A. 2014. Antimicrobial  
616 properties and membrane-active mechanism of a potential  $\alpha$ -helical antimicrobial  
617 derived from cathelicidin PMAP-36. *PloS One* **9**:e86364.
- 618 56. Suh SJ, Shuman J, Carroll LP, Silo-Suh L. 2016. BEEP: An assay to detect bio-  
619 energetic and envelope permeability alterations in *Pseudomonas aeruginosa*. *J*  
620 *Microbiol Meth* **125**:81-6.
- 621 57. Nan YH, Bang J-K, Shin SY. 2009. Design of novel indolicidin-derived antimicrobial  
622 peptides with enhanced cell specificity and potent anti-inflammatory activity.  
623 *Peptides* **30**:832-838.
- 624 58. Veldhuizen E, Schneider V, Agustiandari H, van Dijk A, Tjeerdsma-van Bokhoven J.  
625 2014. Antimicrobial and Immunomodulatory Activities.
- 626 59. Mempin R, Tran H, Chen C, Gong H, Kim Ho K, Lu S. 2013. Release of extracellular  
627 ATP by bacteria during growth. *BMC Microbiol* **13**:301.
- 628 60. Okuda K-i, Zendo T, Sugimoto S, Iwase T, Tajima A, Yamada S, Sonomoto K,  
629 Mizunoe Y. 2013. Effects of bacteriocins on methicillin-resistant *Staphylococcus*  
630 *aureus* biofilm. *Antimicrob Agents and Chemother* 00888-13.
- 631 61. Rausch JM, Marks JR, Rathinakumar R, Wimley WC. 2007.  $\beta$ -Sheet Pore-Forming  
632 Peptides Selected from a Rational Combinatorial Library: Mechanism of Pore  
633 Formation in Lipid Vesicles and Activity in Biological Membranes. *Biochemistry*  
634 **46**:12124-12139.

- 635 62. Rathinakumar R, Walkenhorst WF, Wimley WC. 2009. Broad-spectrum antimicrobial  
636 peptides by rational combinatorial design and high-throughput screening: the  
637 importance of interfacial activity. *J Americ Chem Soci* **131**:7609-7617.
- 638 63. Rajasekaran G, Kim EY, Shin SY. 2017. LL-37-derived membrane-active FK-13  
639 analogs possessing cell selectivity, anti-biofilm activity and synergy with  
640 chloramphenicol and anti-inflammatory activity. *Biochim Biophys Acta* **1859**:722-  
641 733.
- 642 64. Minahk CJ, Farías ME, Sesma F, Morero RD. 2000. Effect of enterocin CRL35 on  
643 *Listeria monocytogenes* cell membrane. *FEMS Microbiol lett* **192**:79-83.
- 644 65. Li J, Koh J-J, Liu S, Lakshminarayanan R, Verma CS, Beuerman RW. 2017.  
645 Membrane active antimicrobial peptides: translating mechanistic insights to design.  
646 *Frontiers in neuroscience* 11:73.
- 647 66. Dwyer DJ, Camacho DM, Kohanski MA, Callura JM, Collins JJ. 2012. Antibiotic-  
648 induced bacterial cell death exhibits physiological and biochemical hallmarks of  
649 apoptosis. *Mol Cell* **46**:561-572.

650

651

652

653

654

655

656

657 Table 1. MIC and MBC values of melimine and Mel4 against strains of *P. aeruginosa*

| Bacterial strains               | Melimine                                       |                                                | Mel4                                           |                                                |
|---------------------------------|------------------------------------------------|------------------------------------------------|------------------------------------------------|------------------------------------------------|
|                                 | MIC nmolml <sup>-1</sup> (µgml <sup>-1</sup> ) | MBC nmolml <sup>-1</sup> (µgml <sup>-1</sup> ) | MIC nmolml <sup>-1</sup> (µgml <sup>-1</sup> ) | MBC nmolml <sup>-1</sup> (µgml <sup>-1</sup> ) |
| <i>P. aeruginosa</i> 6206       | 66 (250)                                       | 132 (500)                                      | 26.6 (62.5)                                    | 53.2 (125)                                     |
| <i>P. aeruginosa</i> 6294       | 66 (250)                                       | 528 (2000)                                     | 26.6 (62.5)                                    | 106.5 (250)                                    |
| <i>P. aeruginosa</i> Paer1      | 66 (250)                                       | 132 (500)                                      | 106.5 (250)                                    | 213 (500)                                      |
| <i>P. aeruginosa</i> ATCC 19660 | 132 (500)                                      | 264 (1000)                                     | 26.6 (62.5)                                    | 26.2 (62.5)                                    |

658 MIC= minimum inhibitory concentration that inhibits the growth of ≥90% of cells

659 MBC = minimum bactericidal concentration that kills ≥99.9% of cells.

660

661

662

663

664

665

666

667

668

669

670

671

672

673

674

675

676 Table 2. Properties of melimine and Mel4 peptides.

| Peptides | Molecular mass | Number of amino acids | Net charge | Hydrophobicity <H>* | Hydrophobic moment <μH>* | Polar residue (number) | Non-polar residue (number) |
|----------|----------------|-----------------------|------------|---------------------|--------------------------|------------------------|----------------------------|
| Melimine | 3786.6         | 29                    | +16        | -0.250              | 0.222                    | 23                     | 6                          |
| Mel4     | 2347.8         | 17                    | +14        | -0.846              | 0.039                    | 17                     | 0                          |

677 \*The properties were predicted using online software <http://heliquet.ipmc.cnrs.fr/cgi-bin/ComputParams.py>

678

679

680

681

682

683

684

685

686

687

688 **Figure legends:**

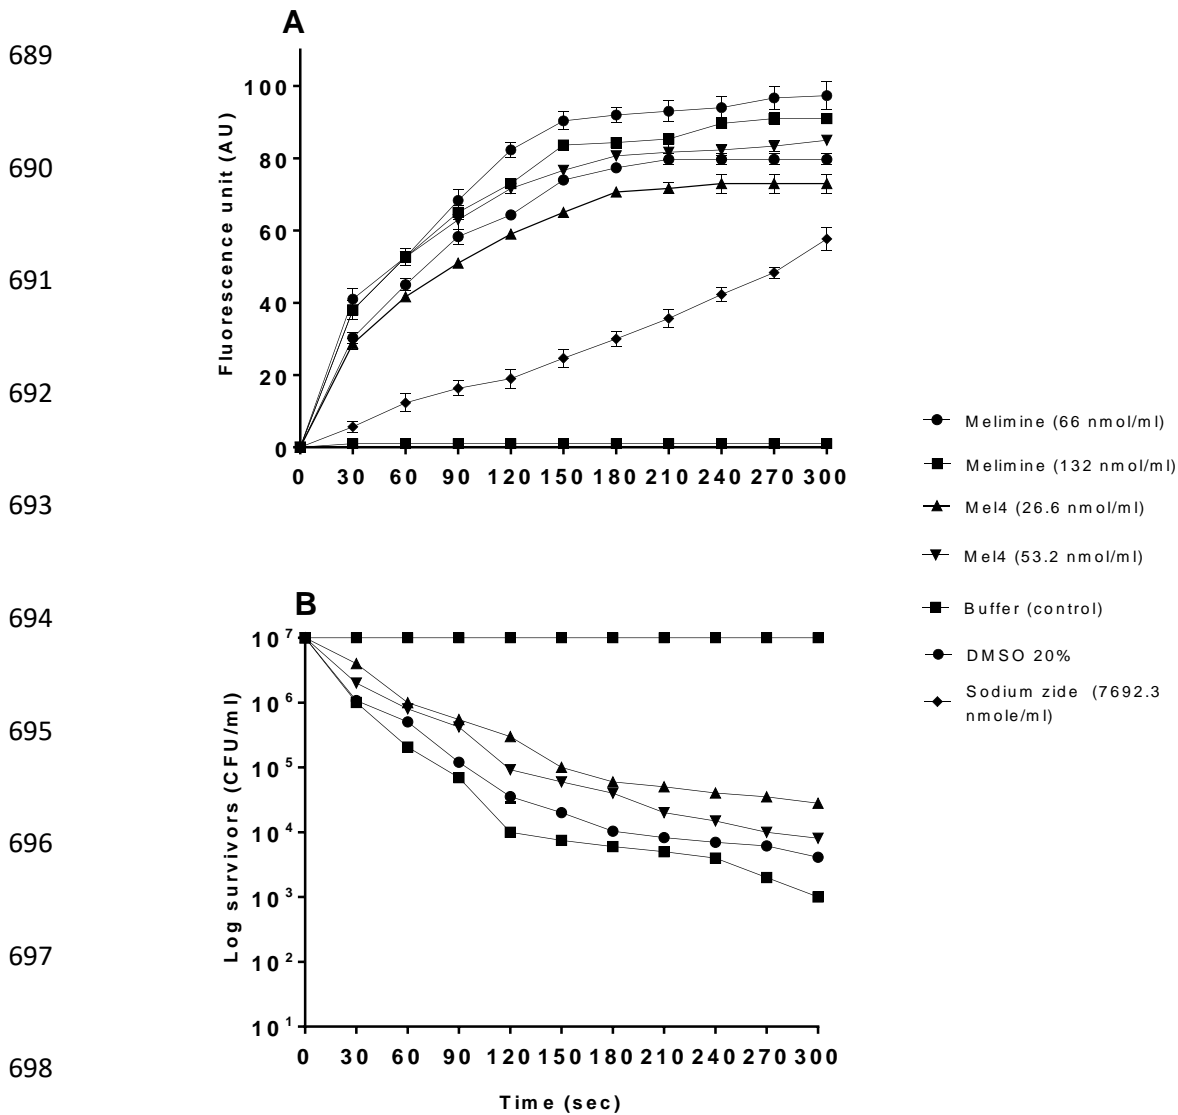

699 **Fig. 1** Cytoplasmic membrane depolarization of *P. aeruginosa* 6294 by melimine and Mel4,  
700 as assessed by release of the membrane potential-sensitive dye DiSC3-(5) measured  
701 spectroscopically at 622<sub>nm</sub> to 670<sub>nm</sub> excitation and emission wavelength, and corresponding  
702 bacterial survival as determined by plate counts. Data presented as means ( $\pm$ SD) of three  
703 independent repeats in triplicate cells. NB, addition of sodium azide to cells did not result in  
704 any cell death compared to controls.

705

706

707

708

709

710

711

712

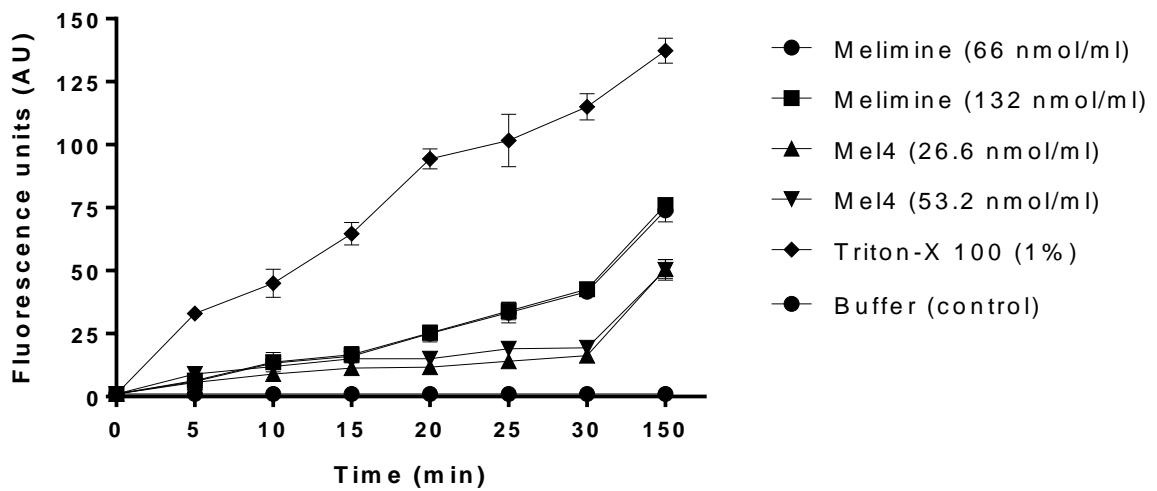

713 **Fig. 2** Cytoplasmic membrane permeability of *P. aeruginosa* 6294 by melimine and Mel4 at

714 different concentrations. Fluorescence due to binding of Sytox green fluorescent probe with

715 DNA was measured spectroscopically at 480<sub>nm</sub> to 522<sub>nm</sub> excitation and emission wavelength.

716 Data presented as means ( $\pm$ SD) of three independent repeats in triplicate.

717



718

719

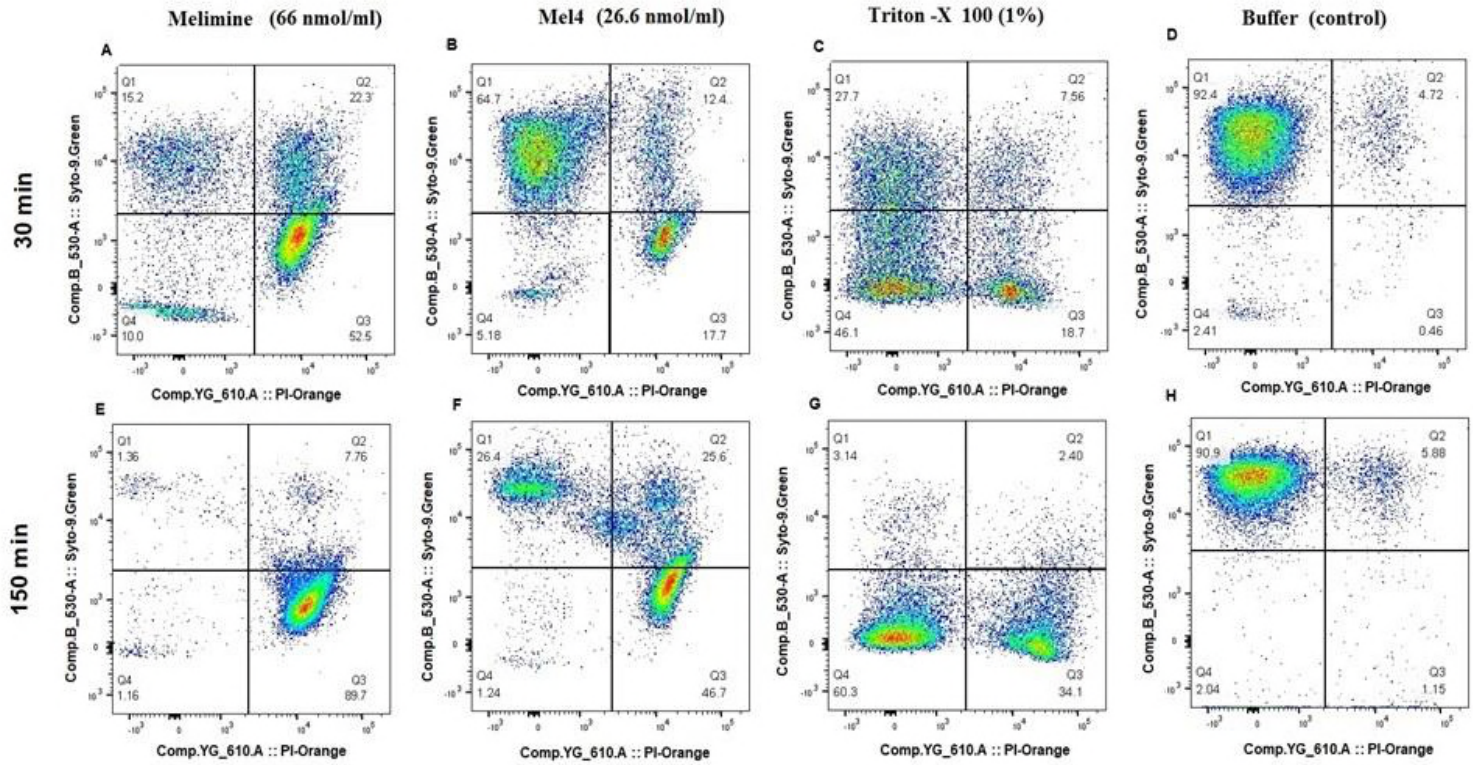

720

721

722

723 **Fig. 3** Membrane permeabilization of *P. aeruginosa* 6294 produced by melimine and Mel4 at

724 their MICs determined by flow cytometry with Syto 9 (membrane permeable) and Propidium

725 Iodide (membrane impermeable) stains.

726

727

728

729

730

731

732

733  
734  
735  
736  
737  
738  
739  
740  
741  
742  
743  
744

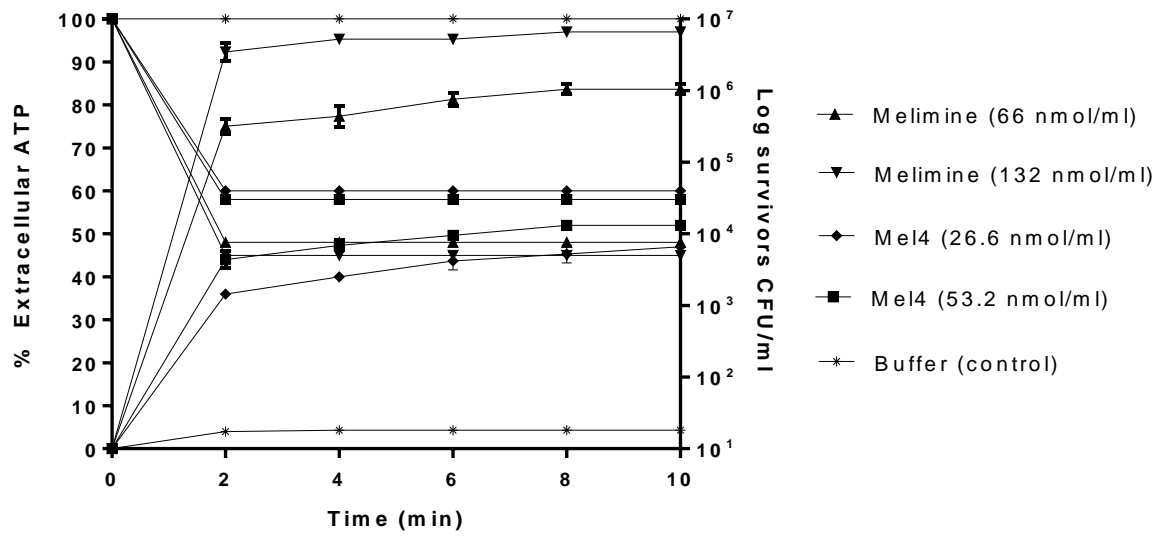

745 **Fig. 4** The effect of melimine and Mel4 on ATP release from *P. aeruginosa* 6294 at MIC and  
746 two times MIC concentrations and the corresponding change in the number of viable cells.  
747 Data presented as means ( $\pm$ SD) of three independent repeats in triplicate compared with  
748 buffer-treated control.

749

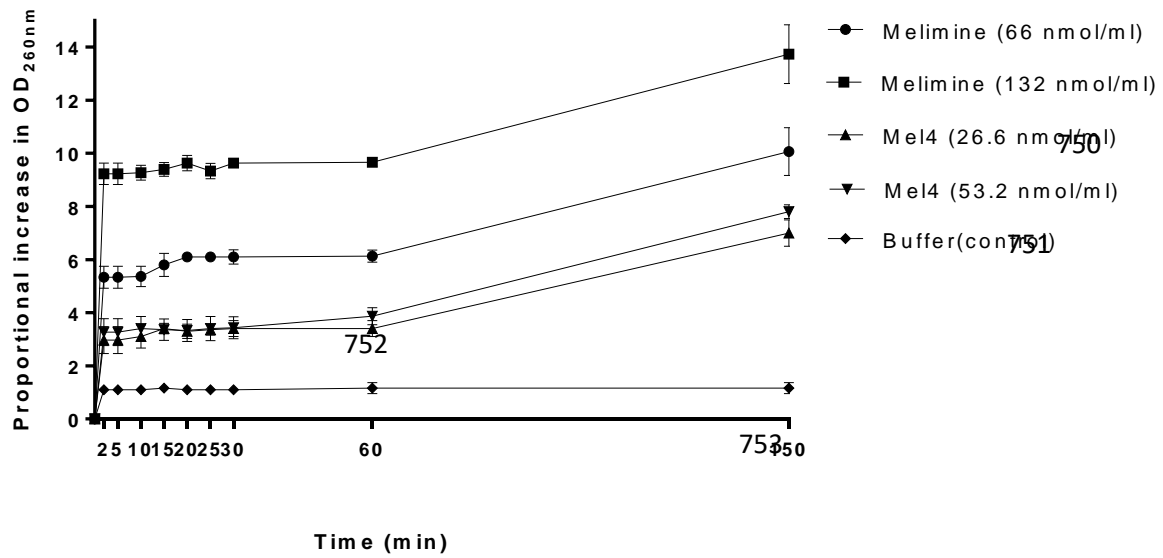

754

755 **Fig. 5** Increase of DNA/RNA from *P. aeruginosa* 6294 due to action of melimine and Mel4  
756 at MIC and two times MIC concentrations determined spectroscopically at OD<sub>260nm</sub>. Data  
757 presented as means ( $\pm$ SD) of three independent repeats in triplicate compared with buffer-  
758 treated control.

759

760

761

762

763

764

765

766

767

768

769

770

771

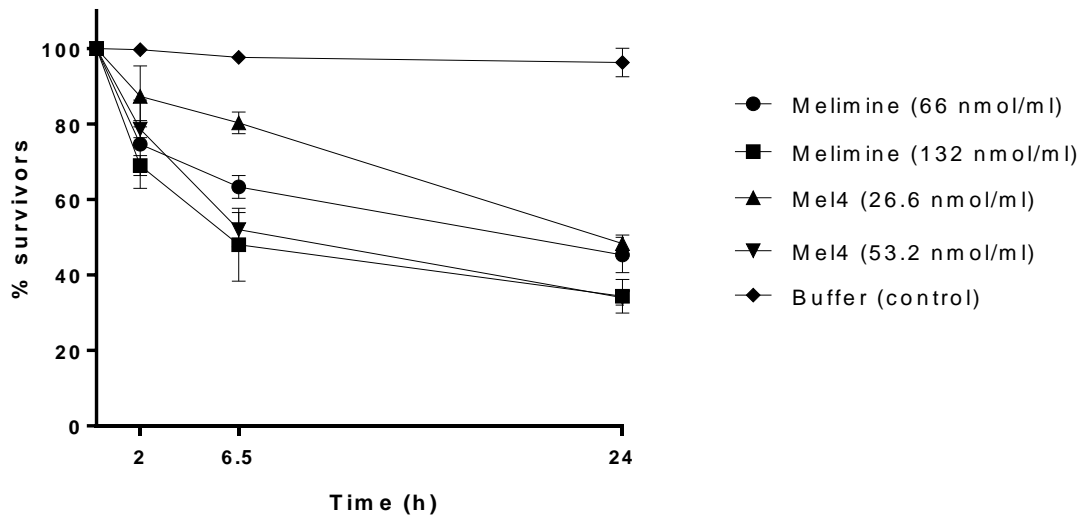

772 **Fig. 6** Lysis of *P. aeruginosa* 6294 by melimine and Mel4 at MIC and two times MIC

773 measured spectroscopically at OD<sub>620nm</sub>. Data presented as means ( $\pm$ SD) of three independent

774 repeats in triplicate compared with buffer-treated control.

775

776

777  
778  
779  
780  
781  
782  
783  
784  
785  
786  
787  
788  
789  
790  
791  
792  
793  
794  
795  
796  
797  
798  
799

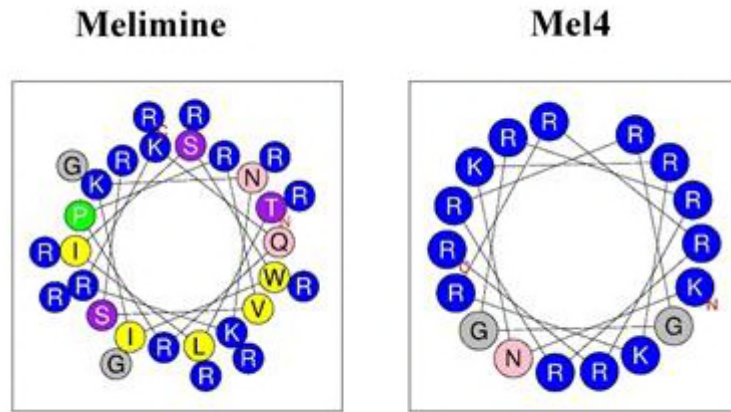

**Fig. 7** Helical wheel projection of melimine and Mel4. Positive charged residues are represented in blue circles, uncharged residues are in grey circles, polar residues in pink circles and hydrophobic residues in yellow circles.

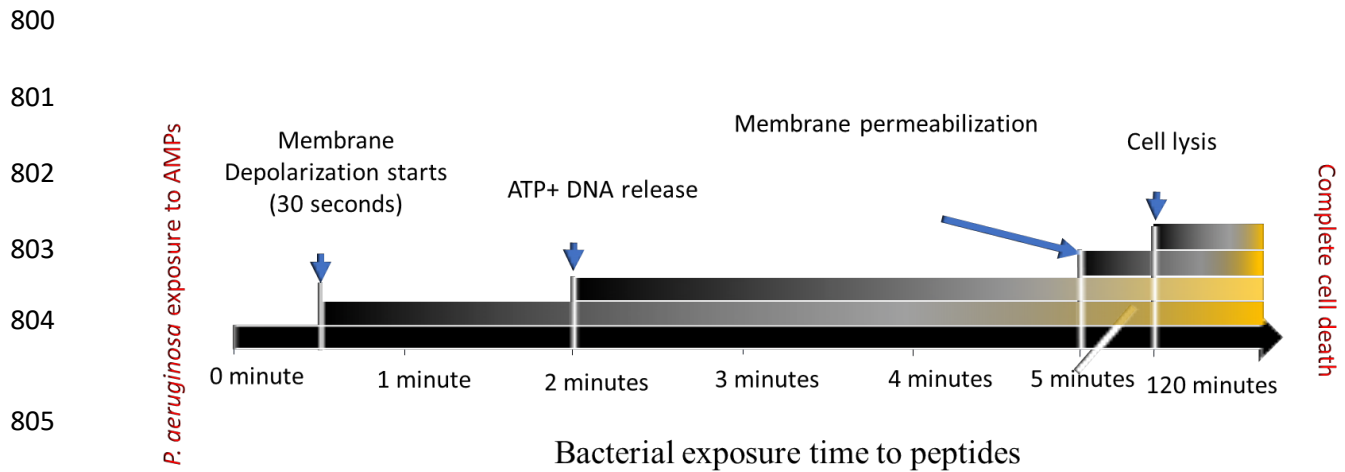

806 **Fig. 8** Timeline of bacterial killing by melimine and Mel4. Both AMPs started cell membrane  
807 depolarization at 30 seconds followed by ATP and DNA/RNA release at 2 minutes. Cell  
808 membrane permeabilization happened at 5 minutes of exposure. Complete bacterial lysis  
809 started at 120 minutes of incubation with peptides. All the events started at same time point  
810 for both AMPs but intensity of event to occur for melimine was higher than Mel4 at each  
811 studied time point.

812

813

814
